# Supplementary material for: Cervical dilatation over time is a poor predictor of severe adverse birth outcomes: a diagnostic accuracy study
Source: PubMed Central journal article supplement (PMC6032950; doi:10.1111/1471-0528.15205), 2018-04-17
Supplement: BJO-125-991-s002.pdf [file BJO-125-991-s002.pdf]

**Table S1.** Calculation of diagnostic accuracy statistics

| Clinical Signs | Severe adverse birth outcomes |        | Sensitivity | Specificity | Positive Likelihood Ratio | Negative Likelihood Ratio | Diagnostic Odds Ratio | J statistic |                 |
|----------------|-------------------------------|--------|-------------|-------------|---------------------------|---------------------------|-----------------------|-------------|-----------------|
|                | Present                       | Absent |             |             |                           |                           |                       |             |                 |
| Predictor      | Positive                      | TP     | FP          | TP          | TN                        | Sens                      | (1-Sens)              | (TP * TN)   | Sens+ Sp -<br>1 |
|                | Negative                      | FN     | TN          | (TP+FN)     | (FP+TN)                   | (1-Sp)                    | Sp                    | (FP * FN)   |                 |

**Table S2.** Equivalence of diagnostic accuracy statistics

| Sensitivity | Specificity | Positive Likelihood Ratio | Negative Likelihood Ratio | Diagnostic Odds Ratio | J statistic [Youden's Index] | AUOCC |
|-------------|-------------|---------------------------|---------------------------|-----------------------|------------------------------|-------|
| 50%         | 50%         | 1.00                      | 1.00                      | 1.00                  | 0.00                         | 0.500 |
| 60.0%       | 60.0%       | 1.50                      | 0.67                      | 2.25                  | 0.20                         | 0.600 |
| 70.0%       | 70.0%       | 2.33                      | 0.43                      | 5.44                  | 0.40                         | 0.700 |
| 80.0%       | 80.0%       | 4.00                      | 0.25                      | 16.00                 | 0.60                         | 0.800 |
| 90.0%       | 90.0%       | 9.00                      | 0.11                      | 81.00                 | 0.80                         | 0.900 |
| 90.9%       | 90.9%       | 9.99                      | 0.10                      | 99.78                 | 0.82                         | 0.909 |
| 95.0%       | 95.0%       | 19.00                     | 0.05                      | 361.00                | 0.90                         | 0.950 |
| 99.99%      | 99.99%      | 9999.00                   | 0.00                      | 99980001.00           | 1.00                         | 1.000 |

AUOCC: Area Under the Receiver Operator Characteristic Curve

Positive Likelihood Ratio: The probability of a person who has the disease testing positive divided by the probability of a person who does not have the disease testing positive

Negative Likelihood Ratio: The probability of a person who has the disease testing negative divided by the probability of a person who does not have the disease testing negative

**Table S3.** Suggested interpretation of diagnostic accuracy statistics<sup>16,18,19,30</sup>

| Interpretation     | Positive Likelihood Ratio | Negative Likelihood Ratio | Diagnostic Odds Ratio | J statistic [Youden's Index] | AUOCC       |
|--------------------|---------------------------|---------------------------|-----------------------|------------------------------|-------------|
| Non-discrimination | 1.00                      | 1.00                      | 1.00                  | 0.00                         | 0.500       |
| Poor               | 1.01-1.50                 | 0.99-0.67                 | 1.01-2.25             | 0.01-0.20                    | 0.501-0.600 |
| Intermediate       | 1.51-9.99                 | 0.66-0.11                 | 2.26-99.99            | 0.21-0.79                    | 0.601-0.899 |
| Excellent          | ≥10.00                    | ≤0.10                     | ≥100.00               | ≥0.80                        | ≥0.900      |

AUOCC: Area Under the Receiver Operator Characteristic Curve

Positive Likelihood Ratio: The probability of a person who has the disease testing positive divided by the probability of a person who does not have the disease testing positive

Negative Likelihood Ratio: The probability of a person who has the disease testing negative divided by the probability of a person who does not have the disease testing negative

**Table S4.** Distribution of the study population according to obstetric groups and the frequency of severe adverse birth outcomes

|                                                                                                                                                        | n          | %           |
|--------------------------------------------------------------------------------------------------------------------------------------------------------|------------|-------------|
| Obstetric groups (N=8,955)                                                                                                                             |            |             |
| Group 1 (nulliparous women with singleton cephalic pregnancy, 37 weeks gestation or more in spontaneous labour)                                        | 2,945      | 32.9%       |
| Group 2 (nulliparous women with singleton cephalic pregnancy, 37 weeks gestation or more, induced onset of labour)                                     | 385        | 4.3%        |
| Group 3 (multiparous women without previous caesarean section, with singleton cephalic pregnancy, 37 weeks gestation or more in spontaneous labour)    | 4,160      | 46.5%       |
| Group 4 (multiparous women without previous caesarean section, with singleton cephalic pregnancy, 37 weeks gestation or more, induced onset of labour) | 379        | 4.3%        |
| Group 5 (All multiparous women with at least one previous caesarean section, singleton cephalic pregnancy, 37 weeks gestation or more)                 | 434        | 4.8%        |
| Group 10 (All women with singleton cephalic preterm pregnancy (less than 37 weeks gestation at childbirth))                                            | 533        | 6.0%        |
| Groups 6, 7 and 9 (All other women with non-cephalic presentations, excluding multiple pregnancies)                                                    | 119        | 1.3%        |
| Severe adverse birth outcomes (N=9995)                                                                                                                 |            |             |
| Apgar score 5' < 6                                                                                                                                     | 143        | 1.4%        |
| Neonatal cardiopulmonary resuscitation                                                                                                                 | 71         | 0.7%        |
| Early neonatal death                                                                                                                                   | 57         | 0.6%        |
| Neonatal use of anticonvulsants                                                                                                                        | 36         | 0.4%        |
| Stillbirths                                                                                                                                            | 23         | 0.2%        |
| C-Section due to suspected uterine rupture                                                                                                             | 11         | 0.1%        |
| Severe maternal outcome associated with dystocia**                                                                                                     | 10         | 0.1%        |
| Uterine rupture                                                                                                                                        | 7          | 0.1%        |
| <b>Any of the above</b>                                                                                                                                | <b>223</b> | <b>2.2%</b> |

\*1,038 women with time inconsistencies and two women with missing information on the key obstetric characteristics were not classified according to the 10-group Robson classification. Group X is composed of women originated from the Robson's Obstetric Groups 6, 7 and 9. This study has no women from Robson's Obstetric Group 8.

\*\* Includes 6 maternal deaths and 4 maternal near-miss cases (survivors of organ dysfunction)

**Table S5.** Diagnostic accuracy of customized labour curves by percentiles

|     |             | Severe adverse birth outcomes |        | Sensitivity<br>(95% CI) | Specificity<br>(95% CI) | Positive Likelihood Ratio<br>(95% CI) | Negative Likelihood Ratio<br>(95% CI) | Diagnostic Odds Ratio<br>(95% CI) | J statistic<br>[Youden's Index]<br>(95% CI) |
|-----|-------------|-------------------------------|--------|-------------------------|-------------------------|---------------------------------------|---------------------------------------|-----------------------------------|---------------------------------------------|
|     |             | Present                       | Absent |                         |                         |                                       |                                       |                                   |                                             |
| p50 | Crossed     | 103                           | 3810   | 53.1%<br>(46.1-60.1)    | 54.1%<br>(53.0-55.1)    | 1.16<br>(1.01-1.32)                   | 0.87<br>(0.75-1.01)                   | 1.33<br>(1.00-1.77)               | 7.2%<br>(0.1-14.3)                          |
|     | Not crossed | 91                            | 4485   |                         |                         |                                       |                                       |                                   |                                             |
| p60 | Crossed     | 88                            | 3244   | 45.4%<br>(38.4-52.4)    | 60.9%<br>(59.8-61.9)    | 1.16<br>(0.99-1.36)                   | 0.90<br>(0.79-1.02)                   | 1.29<br>(0.97-1.72)               | 6.3%<br>(-0.8 – 13.3)                       |
|     | Not crossed | 106                           | 5051   |                         |                         |                                       |                                       |                                   |                                             |
| p70 | Crossed     | 81                            | 2724   | 41.8%<br>(34.8-48.7)    | 67.2%<br>(66.2-68.2)    | 1.27<br>(1.07-1.51)                   | 0.87<br>(0.77-0.98)                   | 1.47<br>(1.10-1.96)               | 8.9%<br>(1.9 – 15.9)                        |
|     | Not crossed | 113                           | 5571   |                         |                         |                                       |                                       |                                   |                                             |
| p80 | Crossed     | 69                            | 2143   | 35.6%<br>(28.8-42.3)    | 74.2%<br>(73.2-75.1)    | 1.38<br>(1.14-1.67)                   | 0.87<br>(0.78-0.97)                   | 1.59<br>(1.18-2.14)               | 9.7%<br>(2.9-16.5)                          |
|     | Not crossed | 125                           | 6152   |                         |                         |                                       |                                       |                                   |                                             |
| p90 | Crossed     | 46                            | 1418   | 23.7%<br>(17.7-29.7)    | 82.9%<br>(82.1-83.7)    | 1.39<br>(1.07-1.79)                   | 0.92<br>(0.85-1.00)                   | 1.51<br>(1.08-2.11)               | 6.6%<br>(0.6 – 12.7)                        |
|     | Not crossed | 148                           | 6877   |                         |                         |                                       |                                       |                                   |                                             |
| p95 | Crossed     | 34                            | 975    | 17.5%<br>(12.2-22.9)    | 88.2%<br>(87.6-88.9)    | 1.49<br>(1.09-2.04)                   | 0.93<br>(0.75-1.00)                   | 1.60<br>(1.10-2.32)               | 5.8%<br>(0.4 – 11.2)                        |
|     | Not crossed | 160                           | 7320   |                         |                         |                                       |                                       |                                   |                                             |

**Table S6.** Diagnostic accuracy of other predictors included in the partograph\*

|                               |         | Severe adverse birth outcomes |        | Sensitivity | Specificity | Positive Likelihood Ratio | Negative Likelihood Ratio | Diagnostic Odds Ratio | J statistic [Youden's Index] |
|-------------------------------|---------|-------------------------------|--------|-------------|-------------|---------------------------|---------------------------|-----------------------|------------------------------|
|                               |         | Present                       | Absent | (95%CI)     | (95%CI)     | (95%CI)                   | (95%CI)                   | (95%CI)               | (95%CI)                      |
| Meconium                      | Present | 62                            | 1220   | 28.4%       | 87.1%       | 2.2                       | 0.82                      | 2.67                  | 15.5%                        |
|                               | Absent  | 156                           | 8203   | (22.5-34.4) | (86.4-87.7) | (1.77-2.73)               | (0.76-0.89)               | (1.98-3.61)           | (9.5-21.5)                   |
| Significant Caput Sucedaneum  | Present | 31                            | 390    | 14.2%       | 95.9%       | 3.41                      | 0.9                       | 3.81                  | 10.0%                        |
|                               | Absent  | 188                           | 9011   | (9.5-18.8)  | (95.4-96.3) | (2.43-4.79)               | (0.85-0.94)               | (2.57-5.64)           | (5.4-14.6)                   |
| Abnormal maternal temperature | Present | 24                            | 362    | 11.9%       | 95.7%       | 2.76                      | 0.92                      | 3                     | 7.6%                         |
|                               | Absent  | 177                           | 8003   | (7.5-16.4)  | (95.2-96.1) | (1.87-4.07)               | (0.87-0.97)               | (1.93-4.65)           | (3.1-12.1)                   |
| Significant moulding          | Present | 22                            | 327    | 10.0%       | 96.5%       | 2.88                      | 0.93                      | 3.08                  | 6.5%                         |
|                               | Absent  | 198                           | 9075   | (6.0-14.0)  | (96.2-96.9) | (1.91-4.33)               | (0.89-0.97)               | (1.96-4.86)           | (2.5-10.5)                   |
| Fetal movements not observed  | Present | 55                            | 1744   | 25.0%       | 81.4%       | 1.35                      | 0.92                      | 1.46                  | 6.4%                         |
|                               | Absent  | 165                           | 7649   | (19.3-30.7) | (80.6-82.2) | (1.07-1.70)               | (0.85-0.99)               | (1.07-1.99)           | (0.7-12.2)                   |
| Abnormal fetal heart rate     | Present | 16                            | 190    | 7.3%        | 98.0%       | 3.63                      | 0.95                      | 3.83                  | 5.3%                         |
|                               | Absent  | 204                           | 9281   | (3.8-10.7)  | (97.7-98.3) | (2.22-5.93)               | (0.91-0.98)               | (2.26-6.50)           | (1.8 – 8.7)                  |
| Slow descent                  | Present | 40                            | 1243   | 22.0%       | 83.2%       | 1.31                      | 0.94                      | 1.4                   | 5.2%                         |
|                               |         |                               |        | (16.0-28.0) | (82.4-84.1) | (0.99-1.73)               | (0.87-1.01)               | (0.98-2.00)           | (-0.9 – 11.3)                |

|                                             |         |     |      |                      |                      |                      |                     |                     |                       |
|---------------------------------------------|---------|-----|------|----------------------|----------------------|----------------------|---------------------|---------------------|-----------------------|
|                                             | Absent  | 142 | 6176 |                      |                      |                      |                     |                     |                       |
| Suboptimal duration of uterine contractions | Present | 39  | 1407 | 18.7%<br>(13.4-23.9) | 83.9%<br>(83.1-84.7) | 1.16<br>(0.87-1.55)  | 0.97<br>(0.91-1.03) | 1.2<br>(0.84-1.70)  | 2.6%<br>(-2.8 – 7.9)  |
|                                             | Absent  | 170 | 7341 |                      |                      |                      |                     |                     |                       |
| Abnormal systolic blood pressure            | Present | 12  | 318  | 5.6%<br>(2.5-8.7)    | 96.4%<br>(96.0-96.8) | 1.58<br>(0.90-2.76)  | 0.98<br>(0.95-1.01) | 1.61<br>(0.89-2.92) | 2.1%<br>(-1.1 – 5.2)  |
|                                             | Absent  | 201 | 8595 |                      |                      |                      |                     |                     |                       |
| Abnormal position of fetal head             | Present | 4   | 66   | 1.9%<br>(0.1-3.8)    | 99.3%<br>(99.1-99.5) | 2.71<br>(0.99-7.63)  | 0.99<br>(0.97-1.00) | 2.74<br>(0.99-7.60) | 1.2%<br>(-0.7 – 3.1)  |
|                                             | Absent  | 203 | 9188 |                      |                      |                      |                     |                     |                       |
| Abnormal maternal heart rate                | Present | 6   | 153  | 2.8%<br>(0.6-5.1)    | 98.3%<br>(98.0-98.6) | 1.66<br>(0.74-3.72)  | 0.99<br>(0.97-1.01) | 1.68<br>(0.73-3.85) | 1.1%<br>(-1.1 – 3.4)  |
|                                             | Absent  | 206 | 8835 |                      |                      |                      |                     |                     |                       |
| Suboptimal number of contractions           | Present | 32  | 1269 | 15.3%<br>(10.4-20.2) | 85.5%<br>(84.8-86.2) | 1.06<br>(0.76-1.46)  | 0.99<br>(0.93-1.05) | 1.07<br>(0.73-1.56) | 0.8%<br>(-4.1 – 5.7%) |
|                                             | Absent  | 177 | 7479 |                      |                      |                      |                     |                     |                       |
| Abnormal diastolic blood pressure           | Present | 2   | 110  | 0.9%<br>(0.0-2.2)    | 98.8%<br>(98.5-99.0) | 0.76<br>(0.189-3.06) | 1<br>(0.99-1.016)   | 0.76<br>(0.19-3.09) | -0.3%<br>(-1.6 – 1.0) |
|                                             | Absent  | 211 | 8809 |                      |                      |                      |                     |                     |                       |

\*Table S7 presents the definitions used for each predictor.

**Table S7.** Definitions of the predictors included in the Table S6 and Figure S1

| Predictor                                   | Codification rule                                                                                                                                                                               |
|---------------------------------------------|-------------------------------------------------------------------------------------------------------------------------------------------------------------------------------------------------|
| Meconium                                    | If the membranes status is ruptured with stale meconium or with fresh meconium, then meconium is present                                                                                        |
| Significant Caput Succedaneum               | If caput succedaneum is moderate or severe, then the caput succedaneum is significant                                                                                                           |
| Abnormal maternal temperature               | If maternal temperature >37.5 or maternal temperature <35.5 then the maternal temperature is abnormal                                                                                           |
| Significant moulding                        | If moulding is second or third degree, then the moulding is significant                                                                                                                         |
| Fetal movements not observed                | If no movement is observed or felt                                                                                                                                                              |
| Abnormal fetal heart rate                   | If fetal heart rate <110 OR fetal heart rate >160 then the fetal heart rate is abnormal                                                                                                         |
| Slow descent                                | If the descent is slower than 90% of women in the database, then the descent is slow. Threshold established through a multi-state Markov model.                                                 |
| Suboptimal duration of uterine contractions | If duration of uterine contractions > 60s OR if labour is slow and duration of uterine contractions < 40s, then the duration of uterine contractions is suboptimal                              |
| Abnormal systolic blood pressure            | If systolic blood pressure >159 or systolic blood pressure <85, then the systolic blood pressure is abnormal                                                                                    |
| Abnormal position of fetal head             | If in the last vaginal examination, position of fetal head is occipito-transverse or occipito-posterior or a position other than occipito-anterior, then the position of fetal head is abnormal |
| Abnormal maternal heart rate                | If maternal heart rate >119 or maternal heart rate <60 then the maternal heart rate is abnormal                                                                                                 |
| Suboptimal number of contractions           | If number of uterine contractions in 10 minutes > 4 OR if labour is slow and number of uterine contractions in 10 minutes < 3 then the number of contractions is suboptimal                     |
| Abnormal diastolic blood pressure           | If diastolic blood pressure >105 then the diastolic blood pressure is abnormal                                                                                                                  |
